# Supplementary material for: One-shot synthesis and solution properties of ROS/pH responsive methoxy poly(ethylene glycol)-b-polycarbonate
Source: Royal Society of Chemistry journal article supplement (doi:10.1039/c9py00060g), 2019-01-01
Supplement: c9py00060g1.pdf [file c9py00060g1.pdf]

## Supplementary information

Yan Zhang,<sup>\*a</sup> Yue Xu,<sup>a</sup> Chao Wei,<sup>a</sup> Chuanhao Sun,<sup>a</sup> Bingkun Yan,<sup>a</sup> Jieni Hu,<sup>a</sup> Wei Lu<sup>b</sup>

<sup>a</sup>Shanghai Key Laboratory of Advanced Polymeric Materials, Key Laboratory for Ultrafine Materials of Ministry of Education, School of Materials and Science and Engineering, East China University of Science and Technology. Shanghai, 200237, P. R. China

<sup>b</sup>Department of Pharmaceutics, School of Pharmacy, Key Laboratory of Smart Drug Delivery, Ministry of Education, State Key Laboratory of Molecular Engineering of Polymers, Fudan University, Shanghai, 200433, P. R. China

<sup>\*</sup>Corresponding author. E-mail: zhang\_yan@ecust.edu.cn Tel: +86 021 65243432

## Results and discussion

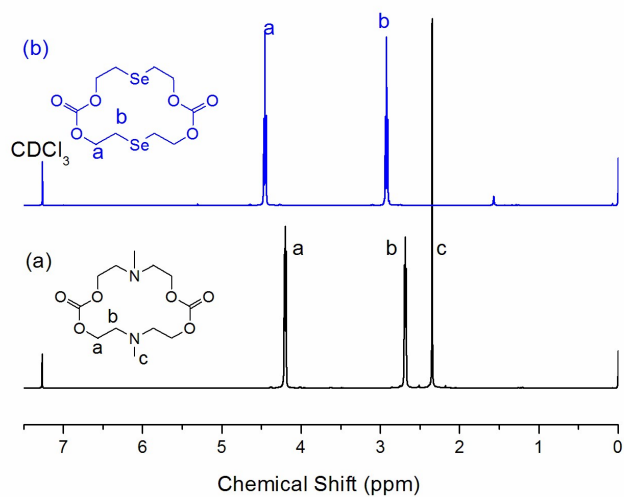

Fig. S1 The typical <sup>1</sup>H-NMR spectrum of MN and MSe in CDCl<sub>3</sub>

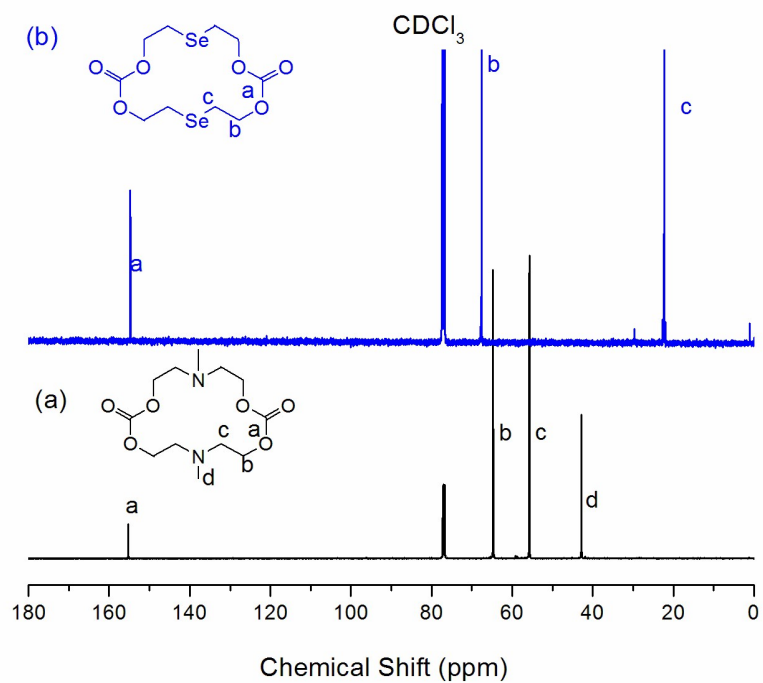

Fig. S2 The typical <sup>13</sup>C-NMR spectrum of MN and MSe in CDCl<sub>3</sub>

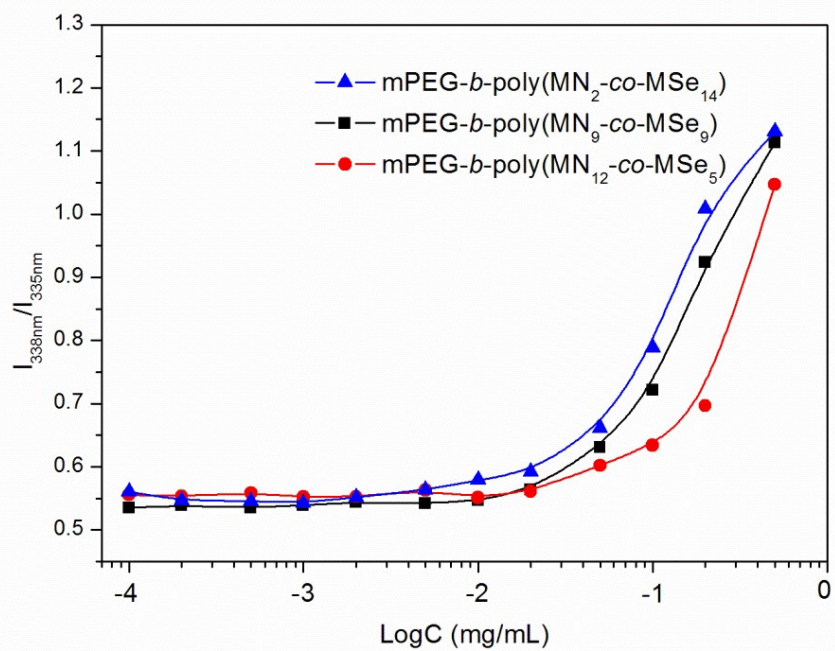

Fig. S3 The CMC determination of the mPEG-*b*-poly(MN-*co*-MSe) copolymers using the fluorescence method with pyrene as a probe

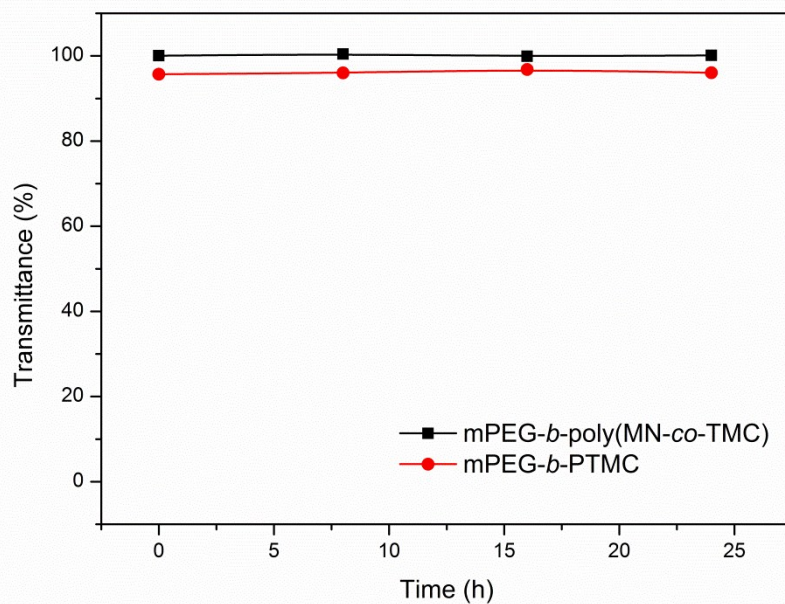

Fig. S4 Turbidity measurements of mPEG-*b*-poly(MN-*co*-TMC) and mPEG-*b*-PTMC copolymers at the presence of 50 mM H<sub>2</sub>O<sub>2</sub> in aqueous solution for 24 h

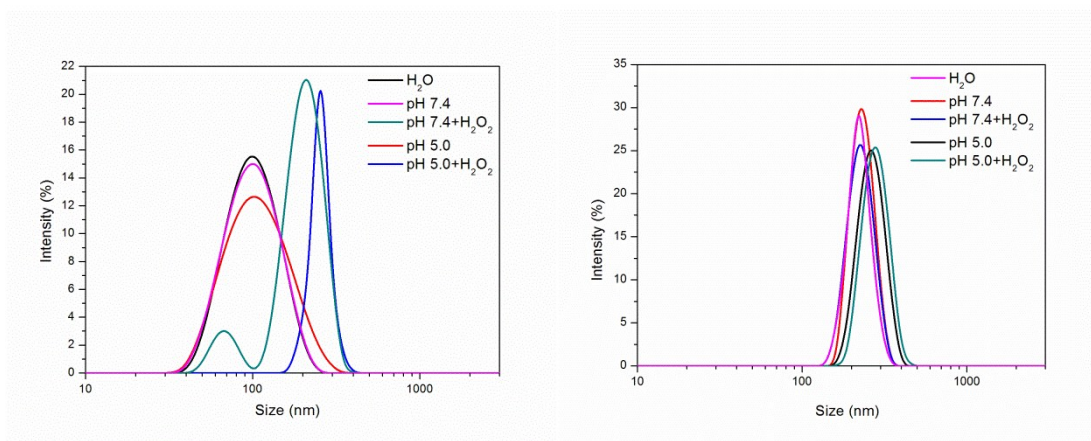

Fig. S5 DLS results of the mPEG-*b*-poly(MSe-*co*-TMC) (left) and mPEG-*b*-PTMC (right) copolymers with different pH or 50 mM H<sub>2</sub>O<sub>2</sub> at 37 °C for 12 h

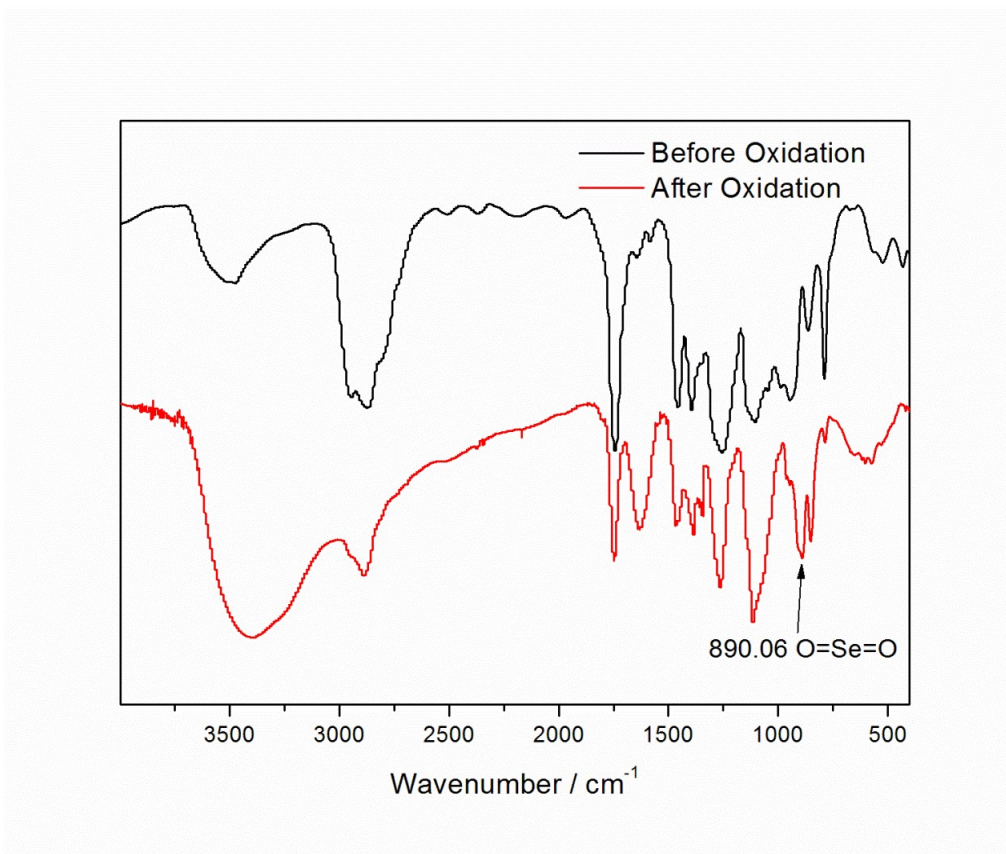

Fig. S6 The FT-IR spectra of mPEG-*b*-poly(MN<sub>9</sub>-*co*-MSe<sub>9</sub>) and mPEG-*b*-poly(MN<sub>9</sub>-*co*-OSe<sub>9</sub>)

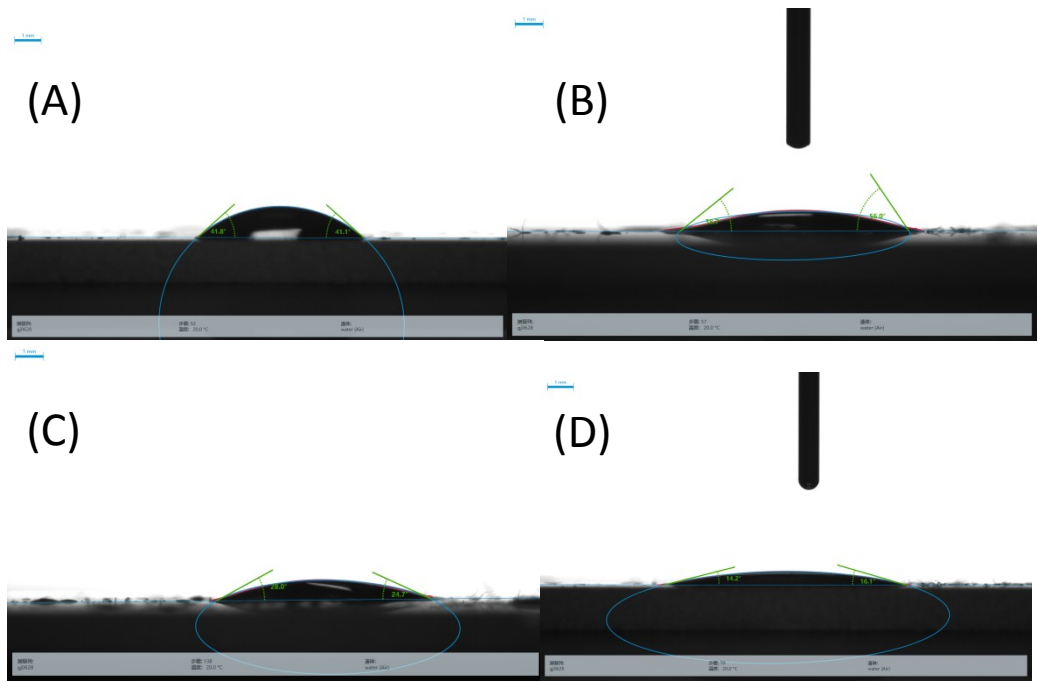

Fig. S7 The water contact angle of mPEG-*b*-poly(MN<sub>9</sub>-*co*-MSe<sub>9</sub>) at different environments.

(A) water (B) pH 5.0 (C) pH 7.4 + H<sub>2</sub>O<sub>2</sub> (D) pH 5.0 + H<sub>2</sub>O<sub>2</sub>

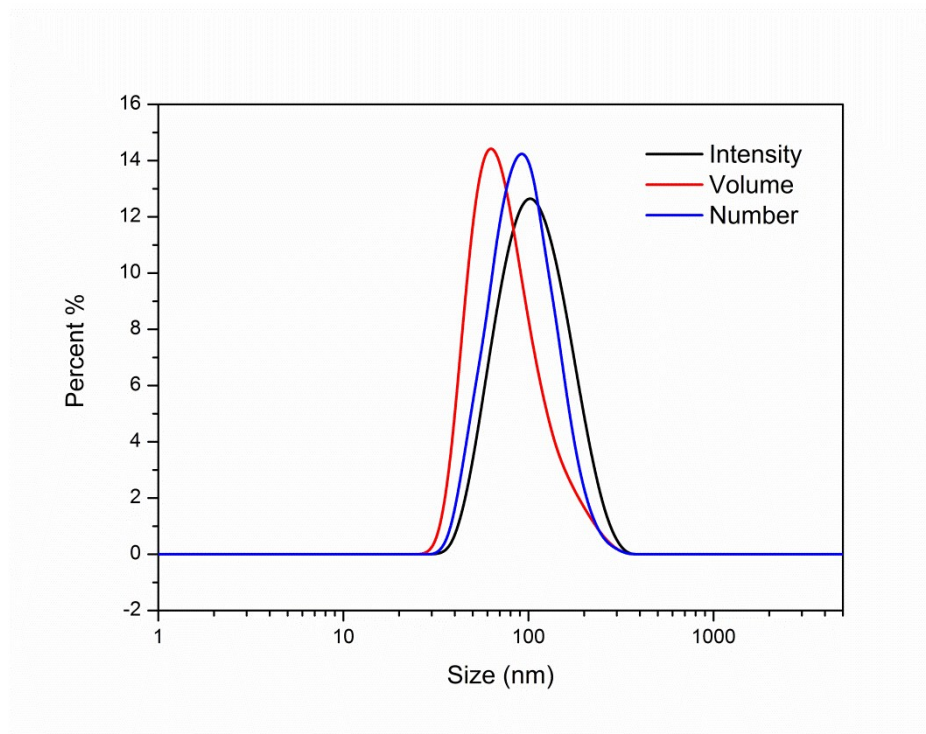

Fig. S8 DLS curve of DOX-loaded mPEG-*b*-poly(MN<sub>9</sub>-*co*-MSe<sub>9</sub>) micelles in aqueous solution

(Size<sub>intensity</sub> = 110.4 nm, PDI = 0.159)

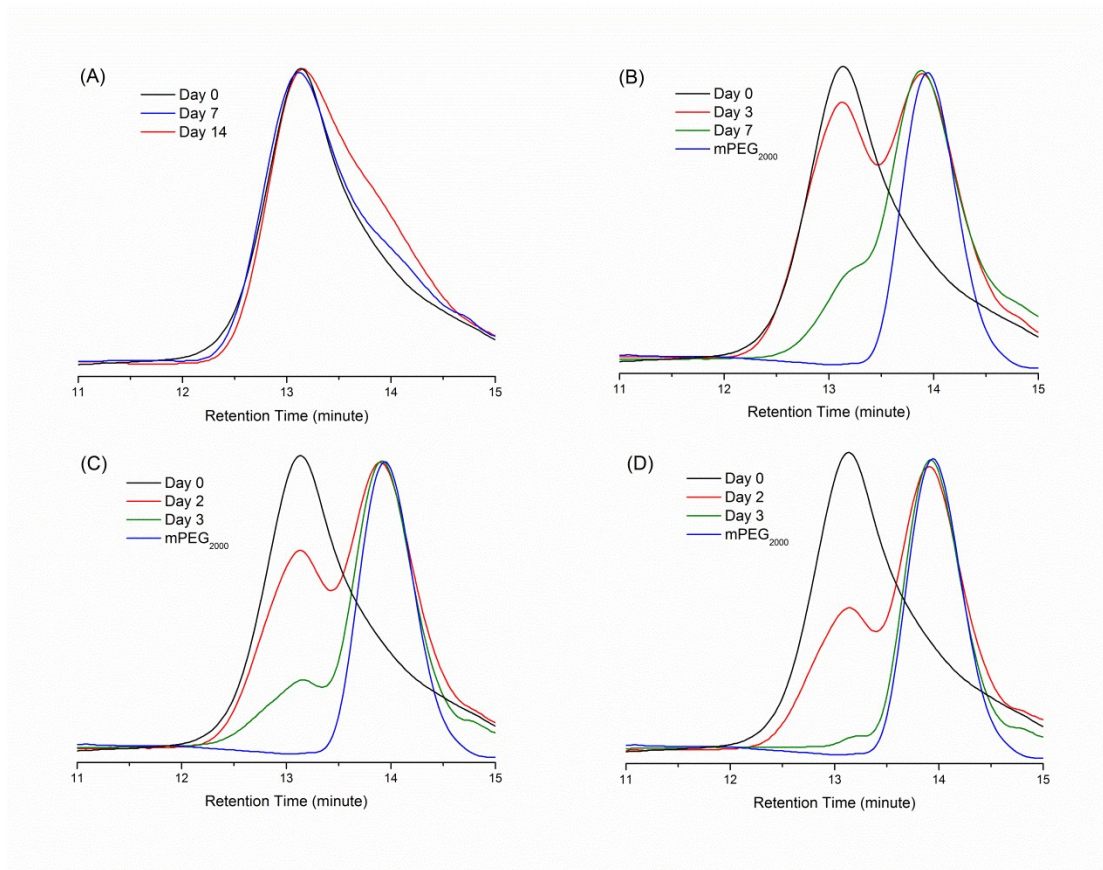

Fig. S9 SEC curves of mPEG-*b*-poly(MN<sub>9</sub>-*co*-MSe<sub>9</sub>) in 0.02 M PBS at 37 °C at marked degradation time. (A) pH 7.4 (B) pH 5.0 (c) pH 7.4 + 50 mM H<sub>2</sub>O<sub>2</sub> (D) pH 5.0 + 50 mM H<sub>2</sub>O<sub>2</sub>

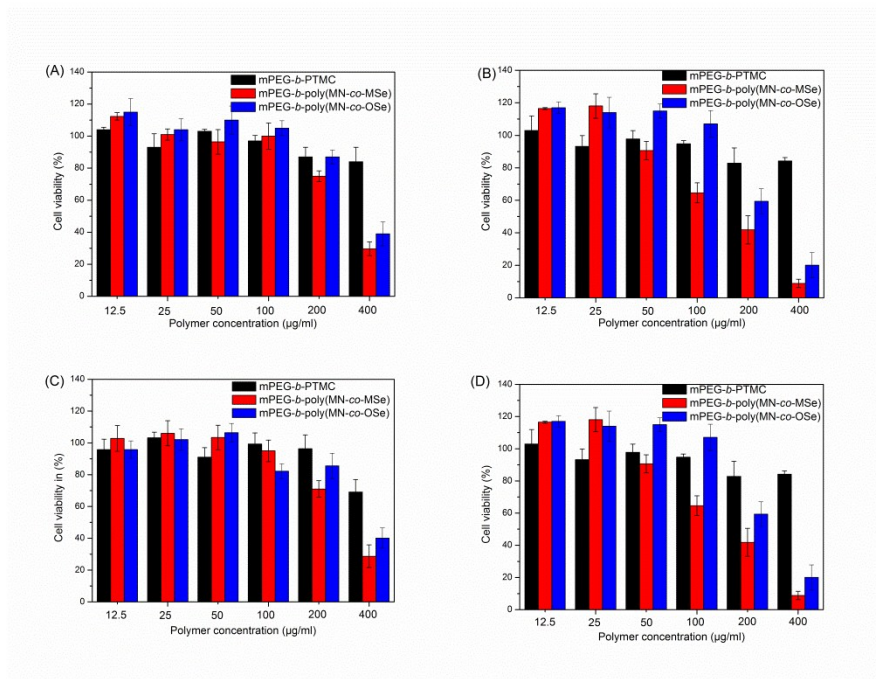

Fig. S10 Cell viability of (A&B) HEK293 cells and (C&D) A549 cells cultured with mPEG<sub>45</sub>-*b*-poly(MN<sub>9</sub>-*co*-MSe<sub>9</sub>) and mPEG<sub>45</sub>-*b*-poly(MN<sub>9</sub>-*co*-OSe<sub>9</sub>) in 48 h and 72 h, respectively.
